# Supplementary material for: Cordycepin Sensitizes Cholangiocarcinoma Cells to Be Killed by Natural Killer-92 (NK-92) Cells
Source: MDPI journal article supplement (doi:10.3390/molecules26195973), 2021-10-01
Supplement: s1 [file s1]

## Supplementary materials

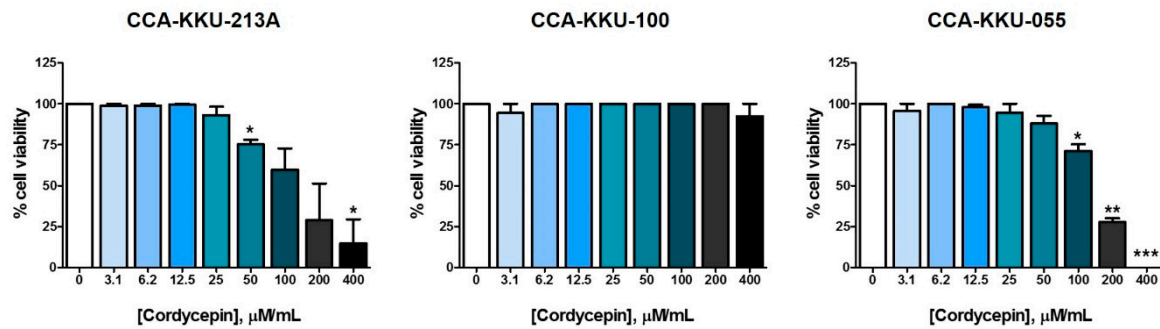

**Figure S1: Effect of cordycepin treatment on CCA cell viability.** The cell viability was measured after treatment with various concentrations of cordycepin for 24 hours by using cell viability assay compared to that of a no-treatment control.

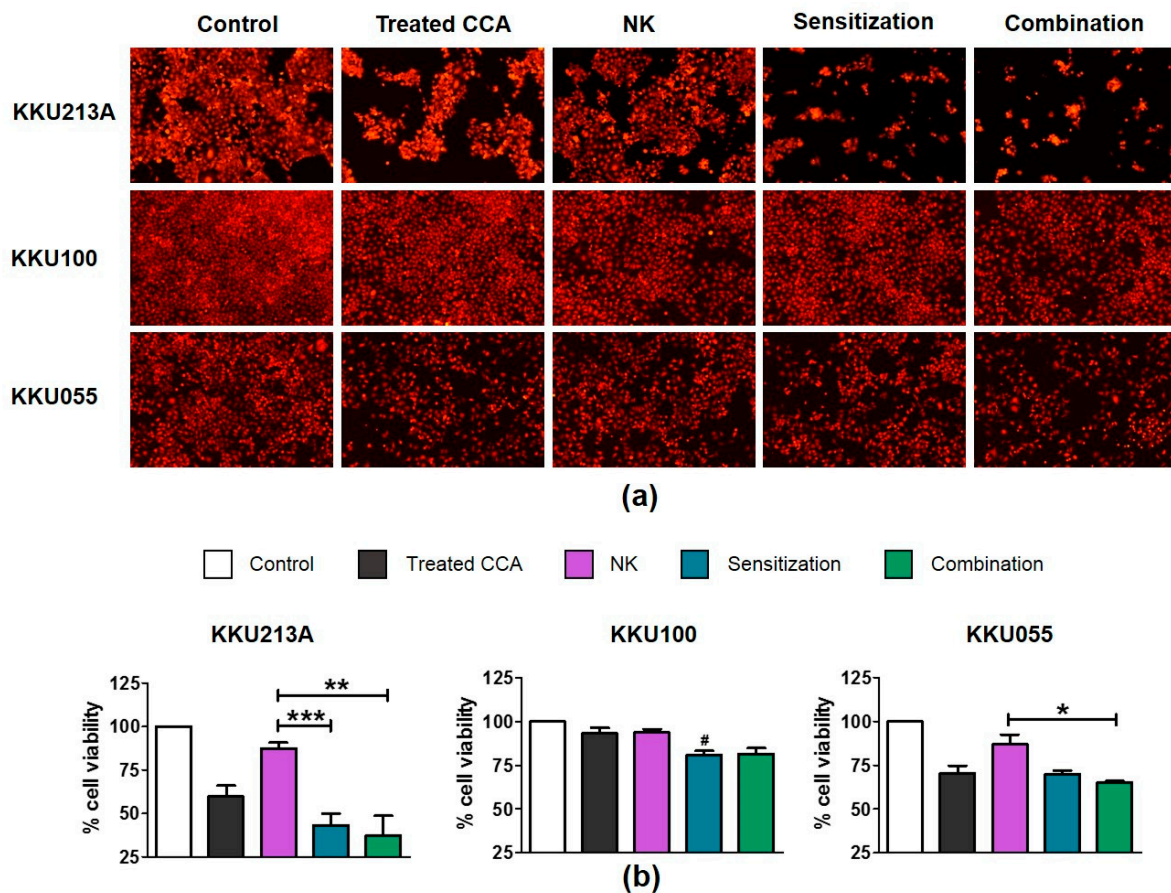

**Figure S2: Effect of 100  $\mu\text{M}$  cordycepin on enhancing NK-92 cytotoxicity to kill CCA cells.** The effect of cordycepin at the concentration of 100  $\mu\text{M}$  to enhance NK killing ability was determined in KKKU-213, KKKU-100, and KKKU-055 by killing assay. The number of living cells after NK cell co-culture in the absence or presence of cordycepin (under sensitization and combination conditions) was observed under the fluorescence microscope (a). The fluorescence intensity was measured and represented as %cell viability relative to a no-treatment control set as 100% (b).

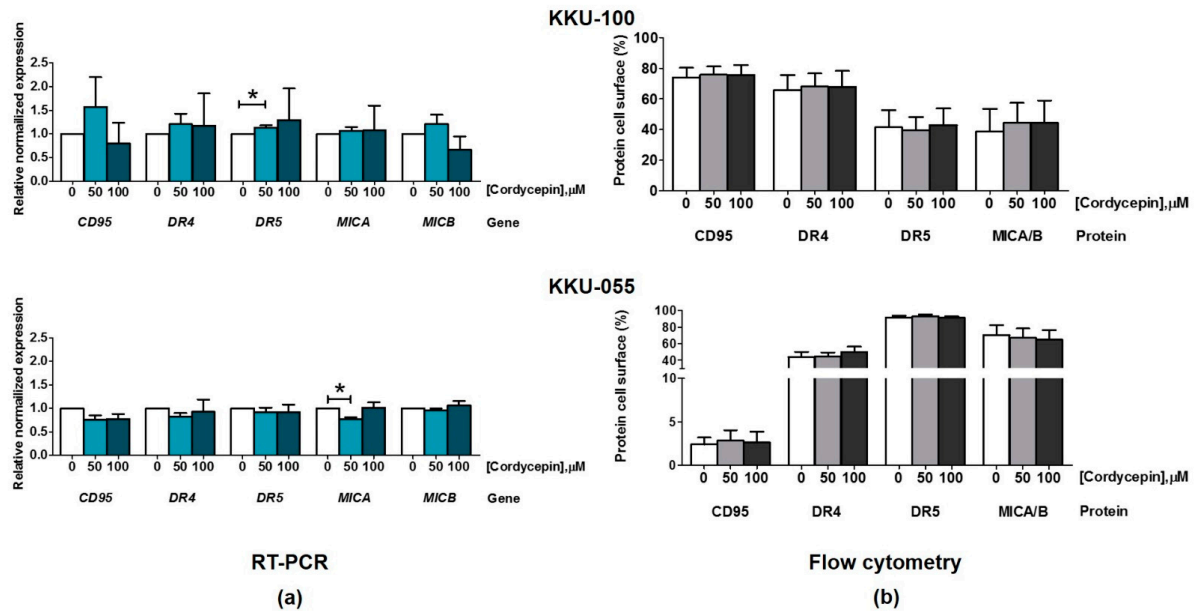

**Figure S3: The effects of cordycepin on modulating CD95, DR4, DR5, MICA/B expression on KKKU-100 and KKKU-055.** Cordycepin at the concentrations of 0, 50 and 100  $\mu$ M were treated in KKKU-100 and KKKU-055 for 24 hours to determine its effect on expression modulation of CD95, DR4, DR5, MICA/B expression alteration in either mRNA (a) and protein levels (b) by using real-time PCR and flowcytometry respectively.

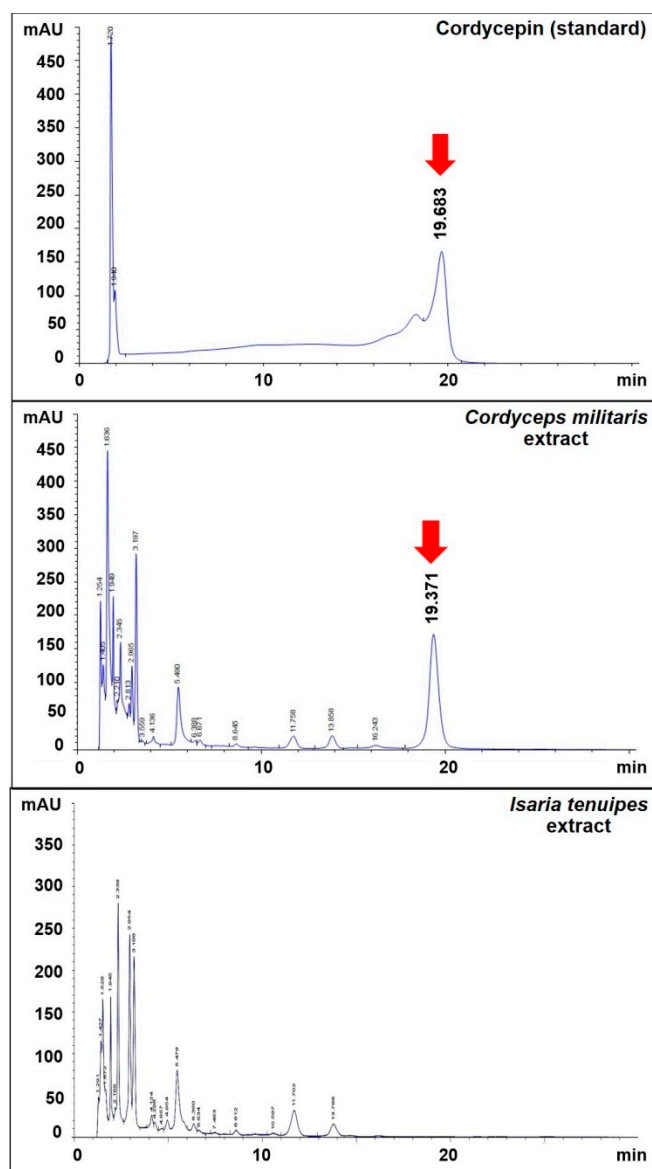

**Figure S4:** The HPLC chromatogram of cordycepin and crude extracts of *C. militaris* and *I. tenuipes*. The extracts were analyzed by using HPLC under mobile phase; water-methanol (92:8, V/V) with retention time of 19.8 min and detected at a wavelength of 254 nm.

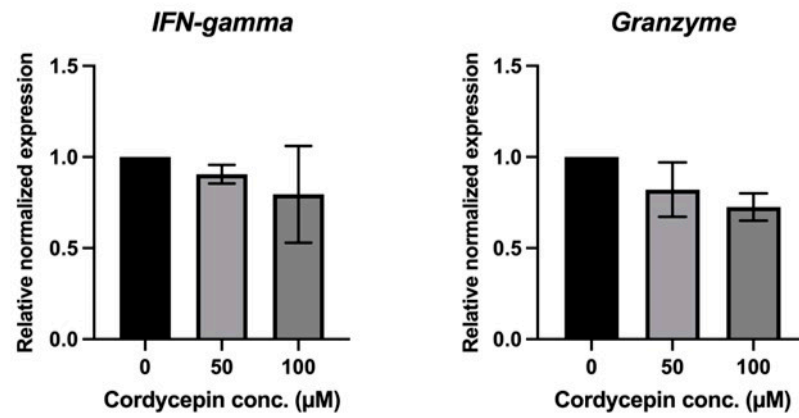

**Figure S5: The effects of cordycepin on modulating IFN-gamma and Granzyme expression in NK-92 cells.** Cordycepin at the concentrations of 0, 50 and 100  $\mu\text{M}$  were treated in NK-92 cells for 24 hours to determine its effect on expression modulation of IFN-gamma and Granzyme mRNA expression alteration by using real-time PCR.

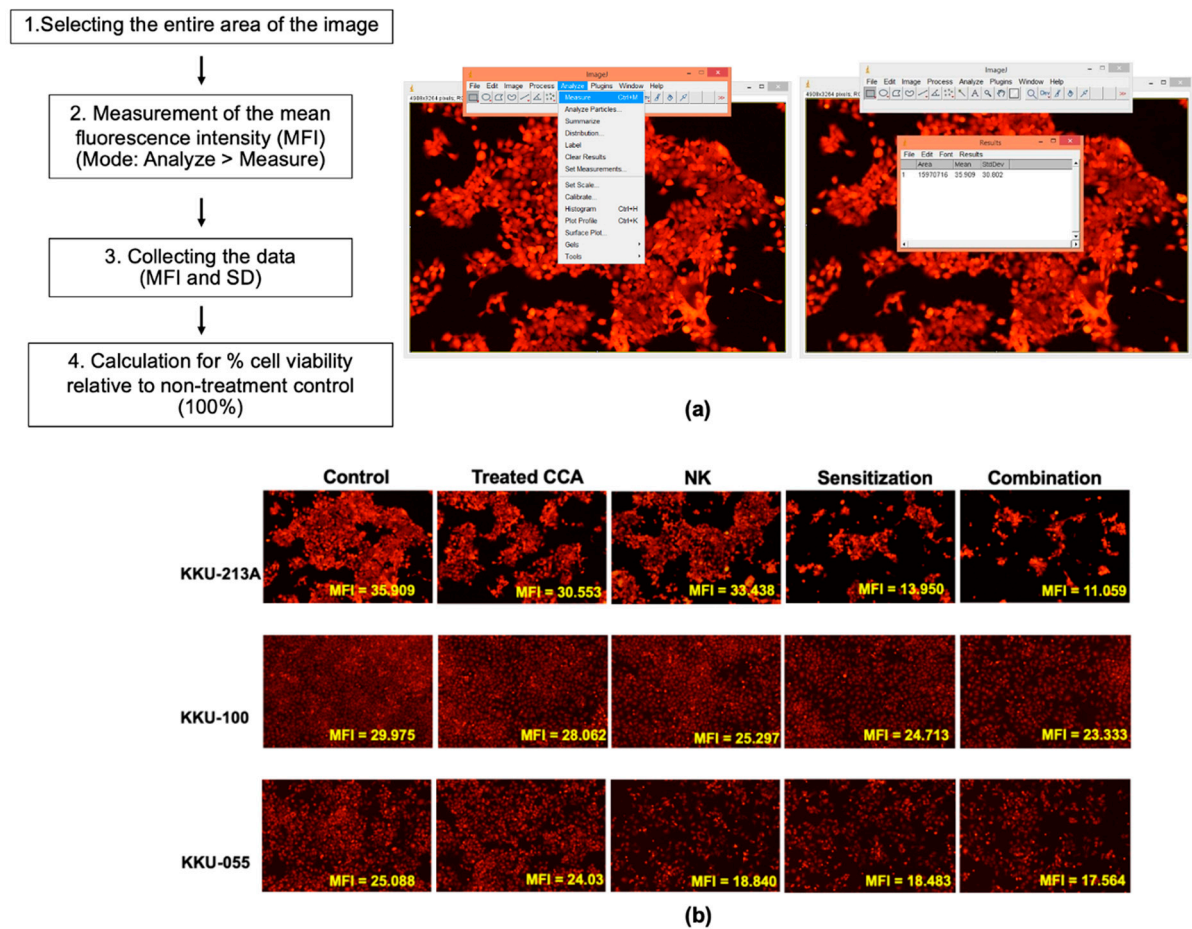

**Figure S6: The analysis of cell viability by measuring the mean fluorescence intensity (ImageJ software).** The photographs of remaining CCA after 24-hour coculturing of NK and CCA cells was taken and used to analyze the mean fluorescence intensity (MFI) using ImageJ software (a). The representative images of KKU-213A, KKU-100 and KKU-055 representing the MFI values derived from ImageJ software. The MFI values were used to calculate the percentage of cell viability relative to non-treatment control which set as 100% (b).

**Table S1: The list of primer sequence**

| Genes       |         | Sequence (5'-3')              | Reference                                                                                                                                                                                                                                                                                         |
|-------------|---------|-------------------------------|---------------------------------------------------------------------------------------------------------------------------------------------------------------------------------------------------------------------------------------------------------------------------------------------------|
| <i>CD95</i> | Forward | ATGCTGGGCATCTGGACCCT          | Li, J.H., M.S. Kluger, L.A. Madge, L. Zheng, A.L. Bothwell, and J.S. Pober, Interferon- $\gamma$ augments CD95 (APO-1/Fas) and pro-caspase-8 expression and sensitizes human vascular endothelial cells to CD95-mediated apoptosis. The American Journal of Pathology 2002, 161(4): p. 1485-1495. |
|             | Reverse | CAACATCAGATAAATTTATTGCC<br>A  |                                                                                                                                                                                                                                                                                                   |
| <i>DR4</i>  | Forward | ACCTTCAAGTTTGTCTCGTC          | Li, J.H., M.S. Kluger, L.A. Madge, L. Zheng, A.L. Bothwell, and J.S. Pober, Interferon- $\gamma$ augments CD95 (APO-1/Fas) and pro-caspase-8 expression and sensitizes human vascular endothelial cells to CD95-mediated apoptosis. The American Journal of Pathology 2002, 161(4): p. 1485-1495. |
|             | Reverse | AACTCTCCCAAAGGGCTATGT         |                                                                                                                                                                                                                                                                                                   |
| <i>DR5</i>  | Forward | AAGACCCTTGTGCTCGTTGT          | Li, J.H., M.S. Kluger, L.A. Madge, L. Zheng, A.L. Bothwell, and J.S. Pober, Interferon- $\gamma$ augments CD95 (APO-1/Fas) and pro-caspase-8 expression and sensitizes human vascular endothelial cells to CD95-mediated apoptosis. The American Journal of Pathology 2002, 161(4): p. 1485-1495. |
|             | Reverse | AGGTGGACACAATCCCTCTG          |                                                                                                                                                                                                                                                                                                   |
| <i>MICA</i> | Forward | CACCTGCTACATGGAACACAGC        | Rodríguez-Rodero, S., S. González, L. Rodrigo, J.L. Fernández-Morera, J. Martínez-Borra, A. López-Vázquez, and C. López-Larrea, Transcriptional regulation of MICA and MICB: a novel polymorphism in MICB promoter alters transcriptional                                                         |
|             | Reverse | TATGGAAAGTCTGTCCGTTGACT<br>CT |                                                                                                                                                                                                                                                                                                   |
| <i>MICB</i> | Forward | CACCTGCTACATGGAACACAGC        |                                                                                                                                                                                                                                                                                                   |

|                  |         |                             |                                                                                                                                                                                                                                                                                                           |
|------------------|---------|-----------------------------|-----------------------------------------------------------------------------------------------------------------------------------------------------------------------------------------------------------------------------------------------------------------------------------------------------------|
|                  | Reverse | ACATGGAATGTCTGCCAATGAT<br>C | regulation by Sp1. European journal of immunology 2007, 37(7): p. 1938-1953.                                                                                                                                                                                                                              |
| <i>IFN-gamma</i> | Forward | GATCCA-GCACAAAGCTGTCA       | Miyatake, Y., H. Ikeda, A. Ishizu, T. Baba, T. Ichihashi, A. Suzuki, U. Tomaru, M. Kasahara, and T. Yoshiki, Role of neuronal interferon- $\gamma$ in the development of myelopathy in rats infected with human T-cell leukemia virus type 1. The American journal of pathology 2006, 169(1): p. 189-199. |
|                  | Reverse | GACTCCTTT-TCCGCTTCCTT       |                                                                                                                                                                                                                                                                                                           |
| <b>Granzyme</b>  | Forward | TGGGGGACCCAGAGATTAAAA       | Morissette, M.C., J. Parent, and J. Milot, Perforin, granzyme B, and FasL expression by peripheral blood T lymphocytes in emphysema. Respiratory research 2007, 8(1): p. 1-9.                                                                                                                             |
|                  | Reverse | TTTCGTCCATAGGAGACAATGC      |                                                                                                                                                                                                                                                                                                           |
